# Supplementary material for: Challenges in the cultural adaptation of the German Myeloma Patient Outcome Scale (MyPOS): an outcome measure to support routine symptom assessment in myeloma care
Source: Springer Nature journal article supplement (doi:10.1186/s12885-020-06730-7), 2020-03-23
Supplement: MOESM2 [file 17824032]

---

## Topic Guide

### Translation, Cross-Cultural Adaptation and Psychometric Testing- MyPOS German Phase 4: Conceptual Definition or Equivalence PPI – target population

---

#### Objectives/ Ziele:

- Identification of topics and aspects that are important for the QoL of multiple myeloma patients  
*Identifizierung von Themen und Aspekten, die für die QoL von Patientinnen und Patienten mit Multiplem Myelom wichtig sind*
  - Exploration to what extent these concerns are affected by the disease  
*Exploration, ob und in wieweit diese Belange durch die Erkrankung beeinträchtigt werden*
  - Identification of gaps or missing topics in MyPOS  
*Identifizierung von Lücken bzw. Fehlenden Themen im MyPOS GERMAN V04*
- 

#### - Warm up:

- Introduce oneself, purpose of the discussion/ *Vorstellung, Zweck des Gespräches*
- Introduction of participants, motivation to take part/ *TN-Vorstellung, Motivation teilzunehmen*

#### - Introduction/ Einleitung:

- Interview procedure, recording so that important information is not lost, confidentiality, duration  
*Ablauf des Interviews, Aufnahme, damit nichts wichtiges verloren geht, von dem was TN mitzuteilen haben, Vertraulichkeit, Dauer*
- Reasons for recording/ *Erklären, warum Aufnahme auf Band*
- Due to confidentiality, the participants are not addressed by name, but if this should happen by mistake, the name will not be transcribed./ *Wg. Vertraulichkeit werden TN nicht mit Namen angesprochen, falls das doch versehentlich passieren sollte, wird dieser nicht transkribiert*
- Interruption or termination by participants possible at any time./ *Unterbrechung oder Abbruch des Gespräches jederzeit möglich.*
- The right to decline to discuss a particular question/ *Ablehnung, über bestimmte Fragen zu diskutieren erlaubt*
- There are no „correct“ or „wrong“ answers./ *Es gibt keine „richtigen“ oder „falschen“ Antworten*

----- START RECORDING -----

#### - QoL: (evtl. Flipchart)

- In general, if you are thinking about your quality of life, which issues are important to you?  
*„Ganz allgemein: wenn Sie über Ihre Lebensqualität nachdenken – welche Belange sind Ihnen wichtig?“*
- What gives your life special joy, value or quality?  
*„Was verleiht Ihrem Leben besondere Freude, Wert oder Qualität?“*
- What affects this quality of life?/ *„Was beeinträchtigt diese Lebensqualität?“*
- What does good quality of life mean to you?/ *„Was bedeutet Ihnen eine gute Lebensqualität?“*
- What could improve your QoL/ what could worsen it?  
*„Was könnte Ihre Lebensqualität noch verbessern/ was verschlechtern?“*

#### - Myeloma and QoL:

- In what sense did the disease enrich/affect your life?  
*„Auf welche Weise, hat die Erkrankung Ihr Leben bereichert?/ beeinträchtigt?“*

----- Pause -----

- MyPOS:

- Please read the questionnaire for yourself and fill it out. You don't have to hand in the sheet.  
*"Bitte lesen Sie den MyPOS für sich und füllen ihn aus. Sie tun das für sich. Sie müssen den Bogen nicht abgeben."*

- Relevance: - Which of the questions are (not) relevant for your QoL?  
*"Welche Fragen sind (ir)relevant für Ihre Lebensqualität?"*

- Layout:

Structure/Struktur:

- 1) Length/ Länge
- 2) Font size and type easy to read?/ Schriftgröße und -type gut lesbar?
- 3) Horizontal or vertical arrangement of response options?  
*Horizontale Anordnung der Antwortoptionen oder vertikal?*

Items/ Fragen: 1) Time intervall requested: 3 days or one week o.k.? proposals  
*Abgefragtes Zeitintervall 3 Tage, 1 Woche o.k.? Vorschlag*

- 2) More free-text? Why (not)?/ Mehr Freitext? Warum (nicht)?

Scale format/ Skalenformat: Likert o.k.?, Number of answer options, proposal  
*Anzahl der Antwortoptionen/ Vorschlag*

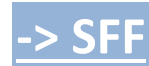

- Application of questionnaires in clinical routine

Anwendung von Fragebögen im klinischen Alltag:

- What issues do you discuss with your physicians on a regular base?  
*Über welche Themen sprechen Sie normalerweise mit Ihrer Ärztin oder Ihrem Arzt?*
- What themes are actually important to you but are rarely or not at all addressed at the clinical encounter?/ Welche Themen, die Ihnen eigentlich wichtig sind, werden eher seltener oder gar nicht angesprochen?
- Do you think that those themes could be caught by a questionnaire?  
*Denken Sie, dass diese Themen durch einen Fragebogen aufgefangen werden könnten?*
- What other issues should be included?  
*Welche Belange sollten noch in den Fragebogen aufgenommen werden?*
- In your opinion, what is the practical value of MyPOS?  
*Welchen praktischen Wert hat der MyPOS aus Ihrer Sicht?*
- How should the questionnaire be used?/ Wie sollte der Fragebogen eingesetzt werden?  
Probe: outpatients/ inpatients? At what point of time? Or phase of illness?  
*Ambulant/ stationär? Was ist ein geeigneter Zeitpunkt? oder Krankheitsphase?*
- Who do you want to talk to about this?/ Mit wem würden Sie darüber sprechen wollen?
- What do you think about a tablet computer version?/ Was halten Sie von einer Tablet Version?

----- Pause -----

- Studien:

What are your expectations towards further studies about the QoL in multiple myeloma?

*„Was erwarten Sie von weiteren Studien zur Lebensqualität bei Multiplem Myelom?“*

What should be considered? What should not be forgotten?

*„Was sollte unbedingt beachtet werden?“ „Was darf nicht vergessen werden?“*

- Abschluss

(1) What do you like to add?/ Was möchten Sie außerdem noch ergänzen?

(2) Thank you very much for your participation! You make an important contribution to the development of a meaningful and acceptable instrument that will help us improve care for myeloma patients.

*Herzlichen Dank für Ihre Teilnahme! Sie leisten einen wichtigen Beitrag zu Entwicklung eines sinnvollen und akzeptablen Instrumentes, das uns helfen wird die Betreuung von Myelompatienten zu verbessern.*

----- THANK YOU! STOP RECORDING Danke! Band stoppen. -----
